# Supplementary material for: Similarities and Differences in Extracellular Vesicle Profiles between Ischaemic Stroke and Myocardial Infarction
Source: MDPI journal article supplement (doi:10.3390/biomedicines9010008), 2020-12-24
Supplement: s1 [file s1]

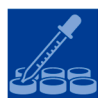

## Supplementary Materials

Table S1. Proteins identified in EVs from HC, MI and IS that have not been found in vesiclepedia.

| Proteins                              | HC             | MI             | IS             |
|---------------------------------------|----------------|----------------|----------------|
| Immunoglobulin mu heavy chain         | Identified     | Identified     | Identified     |
| Keratin, type II cytoskeletal 1       | Identified     | Identified     | Identified     |
| Immunoglobulin gamma-1 heavy chain    | Identified     | Identified     | Identified     |
| Haptoglobin-related protein           | Identified     | Identified     | Identified     |
| Apolipoprotein A-IV                   | Identified     | Identified     | Identified     |
| Immunoglobulin kappa light chain      | Identified     | Identified     | Identified     |
| Alpha-1-antitrypsin                   | Identified     | Identified     | Identified     |
| Complement factor H                   | Identified     | Identified     | Identified     |
| Prothrombin                           | Identified     | Identified     | Identified     |
| Immunoglobulin alpha-2 heavy chain    | Identified     | Identified     | Identified     |
| Immunoglobulin heavy variable 3-30    | Identified     | Identified     | Identified     |
| Serotransferrin                       | Identified     | Identified     | Identified     |
| Antithrombin-III                      | Identified     | Identified     | Identified     |
| Immunoglobulin J chain                | Identified     | Identified     | Identified     |
| Immunoglobulin heavy variable 3-72    | Identified     | Not Identified | Identified     |
| Immunoglobulin heavy variable 5-51    | Identified     | Identified     | Identified     |
| Immunoglobulin heavy variable 1-46    | Identified     | Not identified | Identified     |
| Immunoglobulin heavy variable 3-15    | Identified     | Not identified | Identified     |
| Immunoglobulin heavy variable 3-73    | Identified     | Not identified | Not identified |
| Plasma protease C1 inhibitor          | Identified     | Identified     | Identified     |
| Hemoglobin subunit alpha              | Identified     | Identified     | Identified     |
| Immunoglobulin heavy variable 6-1     | Identified     | Identified     | Identified     |
| Complement component C6               | Identified     | Identified     | Identified     |
| Immunoglobulin heavy variable 4-4     | Identified     | Not identified | Identified     |
| Immunoglobulin heavy variable 3-64D   | Identified     | Identified     | Identified     |
| Complement C1q subcomponent subunit B | Identified     | Not identified | Identified     |
| Immunoglobulin lambda variable 3-10   | Identified     | Identified     | Identified     |
| Immunoglobulin kappa variable 3-20    | Identified     | Identified     | Identified     |
| Immunoglobulin lambda variable 8-61   | Identified     | Identified     | Identified     |
| Immunoglobulin kappa variable 3D-11   | Identified     | Identified     | Identified     |
| Immunoglobulin lambda variable 1-51   | Identified     | Identified     | Identified     |
| Immunoglobulin lambda variable 3-19   | Identified     | Identified     | Identified     |
| Immunoglobulin delta heavy chain      | Identified     | Not identified | Identified     |
| Immunoglobulin lambda variable 7-43   | Identified     | Identified     | Identified     |
| Immunoglobulin heavy variable 1-2     | Identified     | Not identified | Identified     |
| Lysozyme C                            | Identified     | Not identified | Identified     |
| Cathepsin D                           | Identified     | Not identified | Identified     |
| Immunoglobulin lambda variable 3-9    | Not identified | Not identified | Identified     |
| Immunoglobulin heavy variable 4-28    | Not identified | Not identified | Identified     |
| Immunoglobulin lambda variable 1-47   | Not identified | Not identified | Identified     |
| Complement C1q subcomponent subunit A | Not identified | Not identified | Identified     |
| Immunoglobulin heavy variable 4-34    | Not identified | Not identified | Identified     |
| Filaggrin                             | Not identified | Not identified | Identified     |
| Skin-specific protein 32              | Not identified | Identified     | Identified     |
